# Supplementary material for: The histone H3K36 demethylase Rph1/KDM4 regulates the expression of the photoreactivation gene PHR1
Source: PubMed Central journal article supplement — Nucleic Acids Res. 2011 Feb 3;39(10):4151–65. doi: 10.1093/nar/gkr040 (PMC3105397; doi:10.1093/nar/gkr040), 2011-02-03
Supplement: supp_gkr040_ppt_for_SD_20101219.pdf [file supp_gkr040_ppt_for_SD_20101219.pdf]

## Supplementary material

### **The regulatory functions of H3K36 demethylase Rph1 in the *PHR1* expression**

Chung-Yi Liang; Pang-Hung Hsu; Dai-Fang Chou; Chao-Yu Pan; Wei-Chieh Huang; Ming-Daw Tsai; Wan-Sheng Lo

Supplementary tables

Table S1-page 2, 3

Table S2-page 4

Supplementary Figures

Figure S1- page 5

Figure S2- page 5

Figure S3- page 5

Figure S4- page 6

Figure S5- page 6

Figure S6- page 7

Figure S7- page 7

Supplemental References-page 8

## Supplementary table S1

| strain | genotype                                                                                                                                                                                              | background | origin     |
|--------|-------------------------------------------------------------------------------------------------------------------------------------------------------------------------------------------------------|------------|------------|
| SLY644 | <i>MATa/MAT α his3Δ1/his3Δ1, leu2Δ0/leu2Δ0, met15Δ0/MET15, LYS2/lys2Δ0, ura3Δ0/ura3Δ0</i>                                                                                                             | BY4743     | (1)        |
| SLY649 | <i>MAT α his3Δ1, leu2Δ0, ura3Δ0</i>                                                                                                                                                                   | BY4742     | (1)        |
| SLY667 | <i>MATa/MAT α his3Δ1/his3Δ1, leu2Δ0/leu2Δ0, met15Δ0/MET15, LYS2/lys2Δ0, ura3Δ0/ura3Δ0 rph1::KanMX/rph1::KanMX</i>                                                                                     | BY4743     | (2)        |
| SLY726 | <i>MATa/MAT α his3Δ1/his3Δ1, leu2Δ0/leu2Δ0, met15Δ0/MET15, LYS2/lys2Δ0, ura3Δ0/ura3Δ0 rph1::KanMX/rph1::KanMX + [BG1805]</i>                                                                          | BY4743     | (3)        |
| SLY727 | <i>MATa/MAT α his3Δ1/his3Δ1, leu2Δ0/leu2Δ0, met15Δ0/MET15, LYS2/lys2Δ0, ura3Δ0/ura3Δ0 rph1::KanMX/rph1::KanMX + [BG1805-RPH1]</i>                                                                     | BY4743     | (3)        |
| SLY728 | <i>MATa/MAT α his3Δ1/his3Δ1, leu2Δ0/leu2Δ0, met15Δ0/MET15, LYS2/lys2Δ0, ura3Δ0/ura3Δ0 rph1::KanMX/rph1::KanMX + [BG1805-rph1<sup>H235A</sup>]</i>                                                     | BY4743     | (3)        |
| SLY752 | <i>MAT α his3Δ1, leu2Δ0, ura3Δ0, rph1::KanMX + [BG1805]</i>                                                                                                                                           | BY4742     | This study |
| SLY753 | <i>MAT α his3Δ1, leu2Δ0, ura3Δ0, rph1::KanMX + [BG1805-RPH1]</i>                                                                                                                                      | BY4742     | This study |
| SLY794 | <i>MATa ade2-1 can1-100 his3-11 leu2-3 trp1-1 ura3-1 sml1::HIS3</i>                                                                                                                                   | W303       | (4)        |
| SLY795 | <i>MATa ade2-1 can1-100 his3-11 leu2-3 trp1-1 ura3-1 rad53::KanMX sml1::HIS3</i>                                                                                                                      | W303       | (4)        |
| SLY826 | <i>MAT α his3Δ1, leu2Δ0, ura3Δ0, rph1::KanMX</i>                                                                                                                                                      | BY4742     | (2)        |
| SLY843 | <i>MATa ade2-1 can1-100 his3-11 leu2-3 trp1-1 ura3-1 rad53::KanMX rph1::KanMX sml1::HIS3 + [pRS425-P<sub>GAL</sub>] + [BG1805-RPH1]</i>                                                               | W303       | This study |
| SLY849 | <i>MATa ade2-1 can1-100 his3-11 leu2-3 trp1-1 ura3-1 rad53::KanMX rph1::KanMX sml1::HIS3 + [pRS425-P<sub>GAL</sub>-rad53 KD-V5-6XHIS] + [BG1805-RPH1]</i>                                             | W303       | This study |
| SLY851 | <i>MATa ade2-1 can1-100 his3-11 leu2-3 trp1-1 ura3-1 rad53::KanMX rph1::KanMX sml1::HIS3 + [pRS425-P<sub>GAL</sub>-RAD53-V5-6XHIS] + [BG1805-RPH1]</i>                                                | W303       | This study |
| SLY864 | <i>MAT α his3Δ1, leu2Δ0, ura3Δ0, set2::KanMX</i>                                                                                                                                                      | BY4742     | (2)        |
| SLY865 | <i>MATa ade2-1 can1-100 his3-11 leu2-3 trp1-1 ura3-1 rad53::KanMX rph1::KanMX sml1::HIS3 + [pRS425-P<sub>GAL</sub>] + [BG1805]</i>                                                                    | W303       | This study |
| SLY867 | <i>MATa ade2-1 can1-100 his3-11 leu2-3 trp1-1 ura3-1 rad53::KanMX rph1::KanMX sml1::HIS3 + [pRS425-P<sub>GAL</sub>-rad53 KD-V5-6XHIS] + [BG1805]</i>                                                  | W303       | This study |
| SLY869 | <i>MATa ade2-1 can1-100 his3-11 leu2-3 trp1-1 ura3-1 rad53::KanMX rph1::KanMX sml1::HIS3 + [pRS425-P<sub>GAL</sub>-RAD53 -V5-6XHIS] + [BG1805]</i>                                                    | W303       | This study |
| SLY921 | <i>MATa/MAT α his3Δ1/his3Δ1, leu2Δ0/leu2Δ0, met15Δ0/MET15, LYS2/lys2Δ0, ura3Δ0/ura3Δ0 rph1::KanMX/rph1::KanMX + [BG1805-rph1<sup>S459A</sup>]</i>                                                     | BY4743     | This study |
| SLY924 | <i>MATa/MAT α his3Δ1/his3Δ1, leu2Δ0/leu2Δ0, met15Δ0/MET15, LYS2/lys2Δ0, ura3Δ0/ura3Δ0 rph1::KanMX/rph1::KanMX + [BG1805-rph1<sup>S652A</sup>]</i>                                                     | BY4743     | This study |
| SLY931 | <i>MATa/MAT α his3Δ1/his3Δ1, leu2Δ0/leu2Δ0, met15Δ0/MET15, LYS2/lys2Δ0, ura3Δ0/ura3Δ0 rph1::KanMX/rph1::KanMX + [BG1805-rph1<sup>S459AS652A</sup>]</i>                                                | BY4743     | This study |
| SLY934 | <i>MATa/MAT α his3Δ1/his3Δ1, leu2Δ0/leu2Δ0, met15Δ0/MET15, LYS2/lys2Δ0, ura3Δ0/ura3Δ0 rph1::KanMX/rph1::KanMX + [BG1805-rph1<sup>ZFΔ</sup>]</i>                                                       | BY4743     | This study |
| SLY936 | <i>MATa ade2-1 can1-100 his3-11 leu2-3 trp1-1 ura3-1 sml1::HIS3 dun1::KanMX</i>                                                                                                                       | W303       | (4)        |
| SLY963 | <i>MATa, hhf2-hht2::NAT, hta1-htb1::HPH, hht1-hhf1::KAN, hta2-htb2::NAT, ura3-52, trp1Δ2, leu2-3,-112, his3-11, ade2-1, can1-100, GAL1-YLR454w::TRP1 &lt;pRS315-HTA1-Flag-HTB1, HHT1-HHF1&gt;</i>     | W303       | (5)        |
| SLY965 | <i>MATa, hhf2-hht2::NAT, hta1-htb1::HPH, hht1-hhf1::KAN, hta2-htb2::NAT, ura3-52, trp1Δ2, leu2-3,-112, his3-11, ade2-1; can1-100, GAL1-YLR454w::TRP1 &lt;pRS315-HTA1-Flag-HTB1, hht1-K4AHHF1&gt;</i>  | W303       | (5)        |
| SLY966 | <i>MATa, hhf2-hht2::NAT, hta1-htb1::HPH, hht1-hhf1::KAN, hta2-htb2::NAT, ura3-52, trp1Δ2, leu2-3,-112, his3-11, ade2-1, can1-100, GAL1-YLR454w::TRP1 &lt;pRS315-HTA1-Flag-HTB1, hht1-K36AHHF1&gt;</i> | W303       | (5)        |
| SLY967 | <i>MATa, hhf2-hht2::NAT, hta1-htb1::HPH, hht1-hhf1::KAN, hta2-htb2::NAT, ura3-52, trp1Δ2, leu2-3,-112, his3-11, ade2-1, can1-100, GAL1-YLR454w::TRP1 &lt;pRS315-HTA1-Flag-HTB1, hht1-K79AHHF1&gt;</i> | W303       | (5)        |

|         |                                                                                                                                                                                                                                                                                                                                     |        |            |
|---------|-------------------------------------------------------------------------------------------------------------------------------------------------------------------------------------------------------------------------------------------------------------------------------------------------------------------------------------|--------|------------|
| SLY1018 | <i>MATa/MAT<math>\alpha</math> his3<math>\Delta</math>1/his3<math>\Delta</math>1, leu2<math>\Delta</math>0/leu2<math>\Delta</math>0, met15<math>\Delta</math>0/MET15, LYS2/lys2<math>\Delta</math>0, ura3<math>\Delta</math>0/ura3<math>\Delta</math>0 rph1::KanMX/rph1::KanMX + [pRS425]</i>                                       | BY4743 | This study |
| SLY1020 | <i>MATa/MAT<math>\alpha</math> his3<math>\Delta</math>1/his3<math>\Delta</math>1, leu2<math>\Delta</math>0/leu2<math>\Delta</math>0, met15<math>\Delta</math>0/MET15, LYS2/lys2<math>\Delta</math>0, ura3<math>\Delta</math>0/ura3<math>\Delta</math>0 rph1::KanMX/rph1::KanMX + [pRS425-proRPH1-RPH1-FLAG]</i>                     | BY4743 | This study |
| SLY1124 | <i>MATa/MAT<math>\alpha</math> his3<math>\Delta</math>1/his3<math>\Delta</math>1, leu2<math>\Delta</math>0/leu2<math>\Delta</math>0, met15<math>\Delta</math>0/MET15, LYS2/lys2<math>\Delta</math>0, ura3<math>\Delta</math>0/ura3<math>\Delta</math>0 rph1::KanMX/rph1::KanMX + [pRS416-RPH1pro]</i>                               | BY4743 | This study |
| SLY1125 | <i>MATa/MAT<math>\alpha</math> his3<math>\Delta</math>1/his3<math>\Delta</math>1, leu2<math>\Delta</math>0/leu2<math>\Delta</math>0, met15<math>\Delta</math>0/MET15, LYS2/lys2<math>\Delta</math>0, ura3<math>\Delta</math>0/ura3<math>\Delta</math>0 rph1::KanMX/rph1::KanMX + [pRS416-RPH1pro-RPH1-3HA]</i>                      | BY4743 | This study |
| SLY1165 | <i>MATa/MAT<math>\alpha</math> his3<math>\Delta</math>1/his3<math>\Delta</math>1, leu2<math>\Delta</math>0/leu2<math>\Delta</math>0, met15<math>\Delta</math>0/MET15, LYS2/lys2<math>\Delta</math>0, ura3<math>\Delta</math>0/ura3<math>\Delta</math>0 rph1::KanMX/rph1::KanMX + [pRS416-GPD1pro]</i>                               | BY4743 | This study |
| SLY1166 | <i>MATa/MAT<math>\alpha</math> his3<math>\Delta</math>1/his3<math>\Delta</math>1, leu2<math>\Delta</math>0/leu2<math>\Delta</math>0, met15<math>\Delta</math>0/MET15, LYS2/lys2<math>\Delta</math>0, ura3<math>\Delta</math>0/ura3<math>\Delta</math>0 rph1::KanMX/rph1::KanMX + [pRS416-GPD1pro-RPH1-6His-3HA]</i>                 | BY4743 | This study |
| SLY1357 | <i>MATa/MAT<math>\alpha</math> his3<math>\Delta</math>1/his3<math>\Delta</math>1, leu2<math>\Delta</math>0/leu2<math>\Delta</math>0, met15<math>\Delta</math>0/MET15, LYS2/lys2<math>\Delta</math>0, ura3<math>\Delta</math>0/ura3<math>\Delta</math>0 rph1::KanMX/rph1::KanMX + [pRS416-RPH1pro-rph1<sup>H235A</sup>-6His-3HA]</i> | BY4743 | This study |
| SLY1358 | <i>MATa/MAT<math>\alpha</math> his3<math>\Delta</math>1/his3<math>\Delta</math>1, leu2<math>\Delta</math>0/leu2<math>\Delta</math>0, met15<math>\Delta</math>0/MET15, LYS2/lys2<math>\Delta</math>0, ura3<math>\Delta</math>0/ura3<math>\Delta</math>0 rph1::KanMX/rph1::KanMX + [pRS416-GPD1pro-rph1<sup>H235A</sup>-6His-3HA]</i> | BY4743 | This study |
| SLY1159 | <i>MATa/MAT<math>\alpha</math> his3<math>\Delta</math>1/his3<math>\Delta</math>1, leu2<math>\Delta</math>0/leu2<math>\Delta</math>0, met15<math>\Delta</math>0/MET15, LYS2/lys2<math>\Delta</math>0, ura3<math>\Delta</math>0/ura3<math>\Delta</math>0 rph1::KanMX/rph1::KanMX + [BG1805] + [pRS313-GPD1pro-RPD3]</i>               | BY4743 | This study |
| SLY1160 | <i>MATa/MAT<math>\alpha</math> his3<math>\Delta</math>1/his3<math>\Delta</math>1, leu2<math>\Delta</math>0/leu2<math>\Delta</math>0, met15<math>\Delta</math>0/MET15, LYS2/lys2<math>\Delta</math>0, ura3<math>\Delta</math>0/ura3<math>\Delta</math>0 rph1::KanMX/rph1::KanMX + [BG1805-RPH1] + [pRS313-GPD1pro-RPD3]</i>          | BY4743 | This study |

---

Supplementary table S2

| Name        | Sequence                                              | Purpose                   |
|-------------|-------------------------------------------------------|---------------------------|
| ACT1-F      | TGTCACCAACTGGGACGATA                                  | RT-PCR                    |
| ACT1-R      | AACCAGCGTAAATTGGAACG                                  | RT-PCR                    |
| HUG1-F      | ATGACCATGGACCAAGGCCTTAACC                             | RT-PCR                    |
| HUG1-R      | TTAGTTGGAAGTATTCTTACCAATG                             | RT-PCR                    |
| U2-F        | ATCGATGGGAAGAAATGGTGC                                 | RT-qPCR                   |
| U2-R        | ACACCTTTCCTTGCAAACCAA                                 | RT-qPCR                   |
| PHR1-PF     | GAAATCCATAAATCTTTCTATCC                               | ChIP                      |
| PHR1-PR     | TGCTGGTTGTCTGTTCTGTGAA                                | ChIP                      |
| PHR1-CF-5'  | CGGTAATATCTTCCTCGAACG                                 | ChIP                      |
| PHR1-CR-5'  | TCATTGATGACATAAACAGCA                                 | ChIP                      |
| PHR1-CF-3'  | TTGCCAGACGTTTCTGAAGA                                  | ChIP                      |
| PHR1-CR-3'  | TTTCATAAACCCAGCGTTCCC                                 | ChIP                      |
| PHR1 UAS-F  | TAACAAGCTCCGTCAATTGAACC                               | ChIP                      |
| PHR1 UAS-R  | ACTGCTTCCTCGAAAAACGAG                                 | ChIP                      |
| PHR1 URS-F  | GGGTGAAAGTATGCTTACTTTGAC                              | ChIP                      |
| PHR1 URS-R  | ACAATCTCCATTGGTTTAGCCC                                | ChIP                      |
| PHR1 RT3'-F | TCCCGAATTGATTTCTTCCG                                  | RT-qPCR, ChIP             |
| PHR1 RT3'-R | AACTTTCAAAGCACGCTCCC                                  | RT-qPCR, ChIP             |
| ADH1-PF     | TTCTTCCTTCATTCACGCACACT                               | ChIP                      |
| ADH1-PR     | GTTGATTGTATGCTTGGTATAGCTTG                            | ChIP                      |
| ADH1-CF     | TTCAACCAAGTCGTCAAGTCCATCTCTA                          | ChIP                      |
| ADH1-CR     | ATTTGACCCTTTTCCATCTTTTCGTAA                           | ChIP                      |
| ZF del-F    | CCGTCCACTCTGGTGAGAAACCTAAGAAAATACCGTGTATTTCAAAC<br>G  | Site-directed mutagenesis |
| ZF del-R    | CGTTTGAAATACACGGTATTTTCTTAATCTTGTTCTTACCTGATAACA<br>C | Site-directed mutagenesis |
| S459A-F     | CTTTGAAATTA AAAAGAATCTCTGCTTTTCAAGAACAGCCCTTAAAC      | Site-directed mutagenesis |
| S459A-R     | GTTTAAGGGCTGTTCTTGAAAAGCAGAGATTCTTTTTAATTTCAAAG       | Site-directed mutagenesis |
| S652A-F     | GAATACTCAAAAAGGAAGCTCCTGTGCGAGACATC                   | Site-directed mutagenesis |
| S652A-R     | GATGTCTCGACAGGAGCTTCTTTTTGAGTATTC                     | Site-directed mutagenesis |

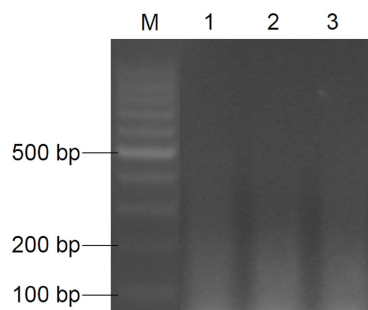

### Supplementary figure S1.

DNA fragments were about 100 to 200 bp after sonication for ChIP. 1: Input DNA of *rph1*  $\Delta$  with control vector. 2: Input DNA of *rph1*  $\Delta$  with wild-type Rph1. 3: Input DNA of *rph1*  $\Delta$  with ZF deletion Rph1.

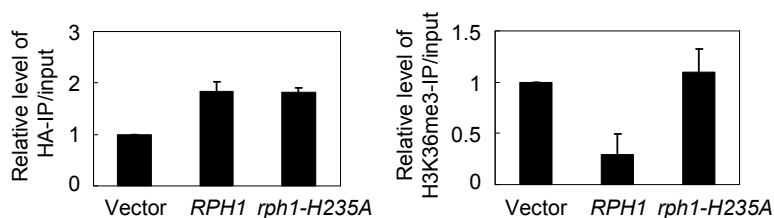

### Supplementary figure S2.

ChIP with anti-HA and anti-H3K36 tri-methylation antibodies were performed in *rph1*  $\Delta$  strains carrying *CEN* plasmid with vector, Rph1 or H235A mutant. DNA abundance was determined by qPCR for URS regions. Error bars represents results from 2 biological repeats.

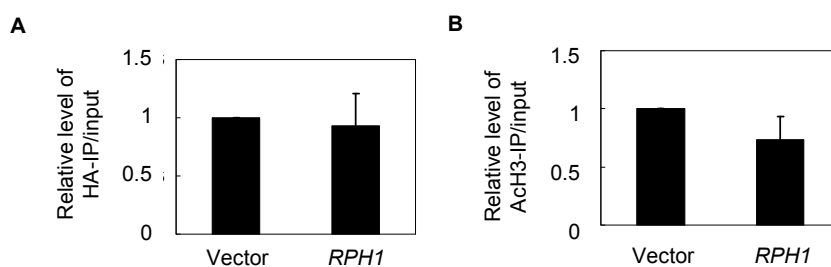

### Supplementary figure S3.

No significant association of Rph1 or reduction of H3 acetylation was observed at the *ADHI* promoter. The *rph1*  $\Delta$  yeast-containing vector and overexpressed wild-type *RPH1* were grown to log-phase and induced with galactose then harvested for ChIP with anti-HA (A) and anti-AcH3 (B). DNA abundance was determined by qPCR for specific *ADHI* promoter. Error bars are the SD of 3 different replicates. .

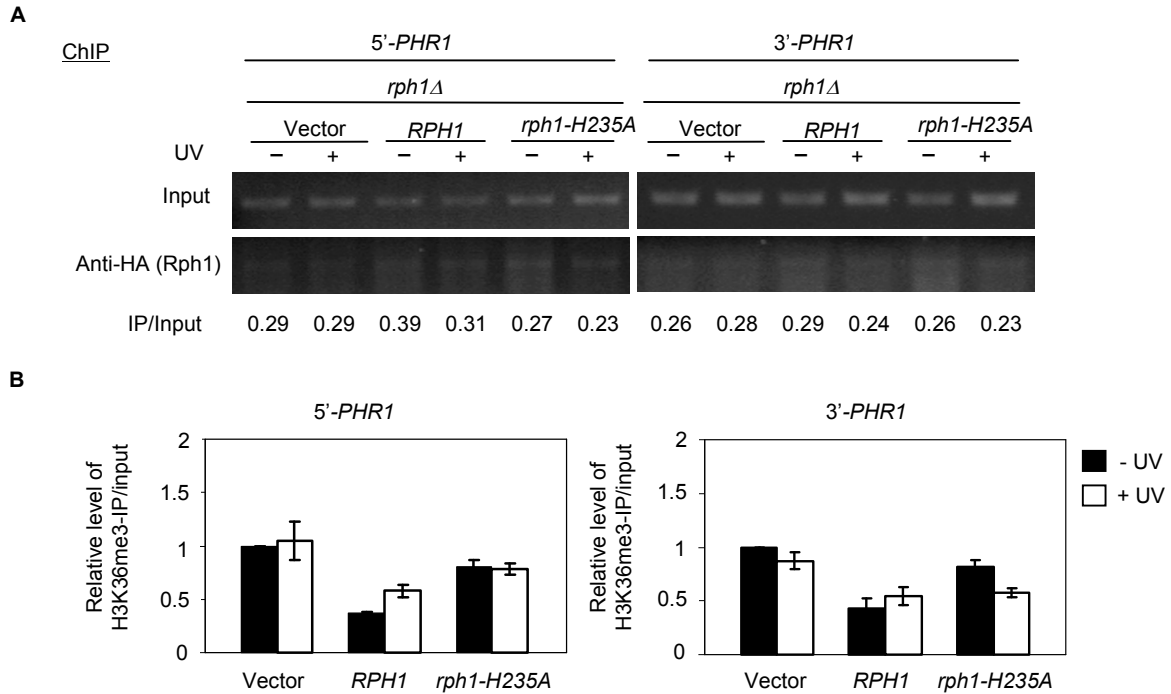

**Supplementary figure S4.**

No detectable binding of Rph1 was obtained in the 5' or 3' coding regions of *PHR1*. (A) Comparable HA-ChIP samples in Figure 4A were analyzed by PCR specific to 5- or 3-terminal coding regions of *PHR1*. The relative immunoprecipitation (IP)/input values of anti-HA ChIP are shown. (B) Comparable H3K36me3-ChIP samples in Figure 4A were analyzed by PCR specific to 5- or 3-terminal coding regions of *PHR1*. Error bars show the SD of 2 biological replicates.

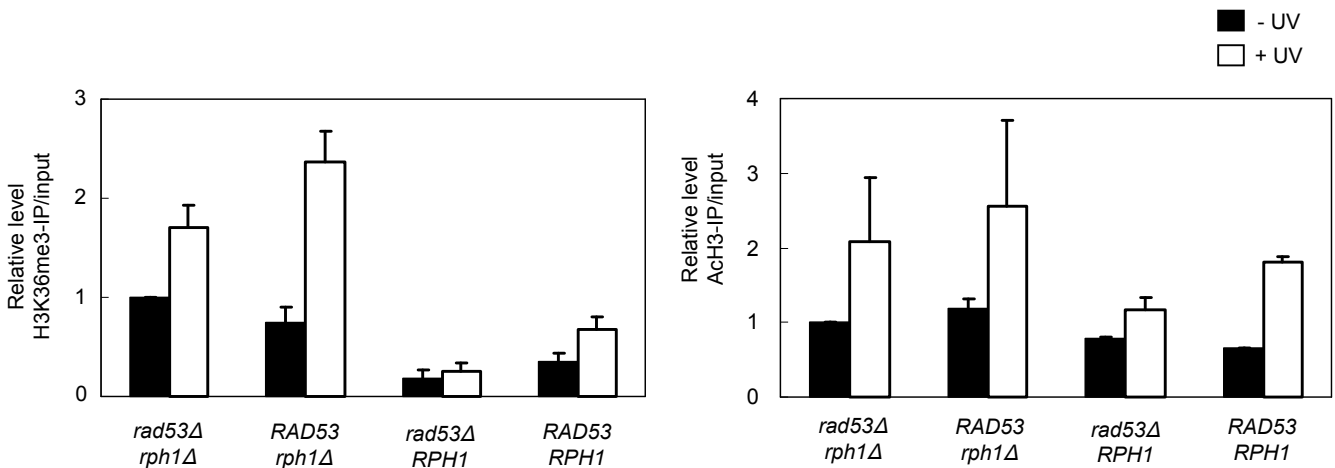

**Supplementary figure S5.**

H3K36me3 and acH3 at URS of *PHR1*. Samples are comparable to those in Figure 5D. Bar graphs show qPCR results in URS of *PHR1* promoter. Results are from 2 biological samples.

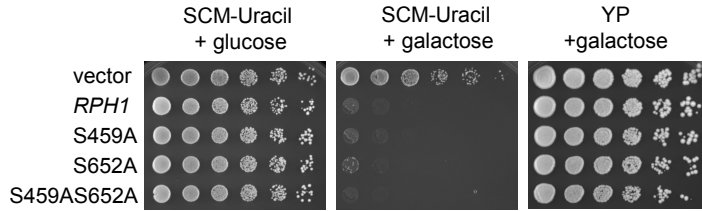

**Supplementary figure S6.**

The *rph1*  $\Delta$  carrying wild-type *RPH1* or mutants under *GAL1* promoter were grown on selective plates with glucose or galactose and YPGal plate after 4-hr induction with galactose . Comparable strains were from Figure 6B. Photographs were taken after 3 days' incubation at 30 °C.

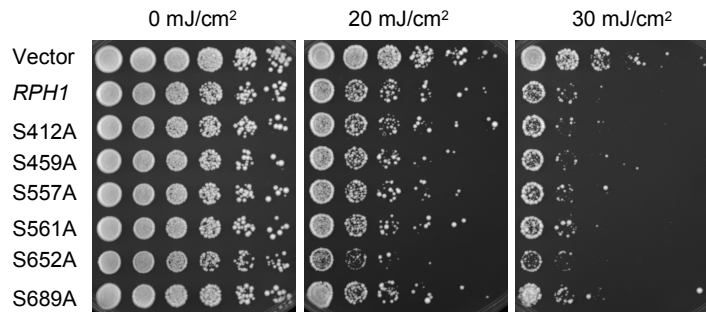

**Supplementary figure S7.**

UV-sensitivity test of 6 phospho-mutants. The *rph1*  $\Delta$  carrying wild-type *RPH1* or mutants under *GAL1* promoter were grown to early log phase and subject to UV irradiation with indicated doses after 4-hours induction by galactose. All plates were photographed after 3 days' incubation.

### Supplementary references

1. Brachmann, C.B., Davies, A., Cost, G.J., Caputo, E., Li, J., Hieter, P. and Boeke, J.D. (1998) Designer deletion strains derived from *Saccharomyces cerevisiae* S288C: a useful set of strains and plasmids for PCR-mediated gene disruption and other applications. *Yeast*, **14**, 115-132.
2. Winzeler, E.A., Shoemaker, D.D., Astromoff, A., Liang, H., Anderson, K., Andre, B., Bangham, R., Benito, R., Boeke, J.D., Bussey, H. *et al.* (1999) Functional characterization of the *S. cerevisiae* genome by gene deletion and parallel analysis. *Science*, **285**, 901-906.
3. Tu, S., Bulloch, E.M., Yang, L., Ren, C., Huang, W.C., Hsu, P.H., Chen, C.H., Liao, C.L., Yu, H.M., Lo, W.S. *et al.* (2007) Identification of histone demethylases in *Saccharomyces cerevisiae*. *J Biol Chem*, **282**, 14262-14271.
4. Zhao, X. and Rothstein, R. (2002) The Dun1 checkpoint kinase phosphorylates and regulates the ribonucleotide reductase inhibitor Sml1. *Proc Natl Acad Sci U S A*, **99**, 3746-3751.
5. Fleming, A.B., Kao, C.F., Hillyer, C., Pikaart, M. and Osley, M.A. (2008) H2B ubiquitylation plays a role in nucleosome dynamics during transcription elongation. *Mol Cell*, **31**, 57-66.
